# Supplementary material
Source: MDPI journal article supplement (https://www.mdpi.com/2073-4441/14/23/3826)
Supplement: s1 [file s1]

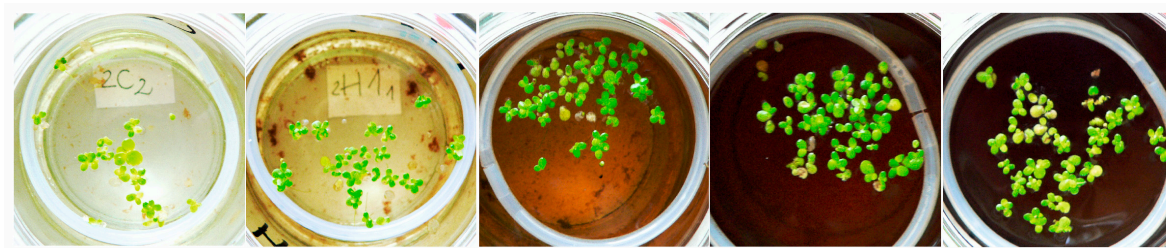

**Figure S1.** Experimental cylinders with *Lemna minor* after seven-day exposition (from left to right: control [c], h1, h2, h3 and h4 treatments).
